# Supplementary material for: Seminal fluid proteins induce transcriptome changes in the Aedes aegypti female lower reproductive tract
Source: PubMed Central journal article supplement (PMC8672594; doi:10.1186/s12864-021-08201-0), 2021-12-15
Supplement: 12864_2021_8201_MOESM1_ESM.pdf [file 12864_2021_8201_MOESM1_ESM.pdf]

# SUPPLEMENTARY INFORMATION

## **Seminal fluid proteins induce transcriptome changes in the *Aedes aegypti* female lower reproductive tract**

I. Alexandra Amaro<sup>1</sup>, Yasir H. Ahmed-Braimah<sup>2</sup>, Garrett P. League<sup>1</sup>, Sylvie A. Pitcher<sup>1</sup>, Frank W. Avila<sup>3</sup>, Priscilla C. Cruz<sup>1</sup>, Laura C. Harrington<sup>1\*</sup>,  
and Mariana F. Wolfner<sup>4\*</sup>

1 - Department of Entomology, Cornell University, Ithaca, NY 14853, United States,

2 - Department of Biology, Syracuse University, Syracuse NY 13244, United States,

3 - Max Planck Tandem Group in Mosquito Reproductive Biology, Universidad de Antioquia, Medellín 050010, Colombia

4 - Department of Molecular Biology and Genetics, Cornell University, Ithaca, NY 14853, United States

**Supplementary Table 1.** Transcript-level changes (10 down-regulated, 122 up-regulated) and their respective fold change (logFC) in the virgin female LRT 24 h after saline injection compared to non-injected females. The logFC for the 42 genes that are altered after injection of MAG extract are included. NA=not annotated

| GeneID     | VectorBase Description                                               | Saline-injected vs non-injected logFC | MAG extract-injected vs non-injected logFC | GeneID     | VectorBase Description                                    | Saline-injected vs non-injected logFC | MAG extract-injected vs non-injected logFC |
|------------|----------------------------------------------------------------------|---------------------------------------|--------------------------------------------|------------|-----------------------------------------------------------|---------------------------------------|--------------------------------------------|
| AAEL024784 | NA                                                                   | -2.76                                 |                                            | AAEL021625 | NA                                                        | 1.74                                  |                                            |
| AAEL014171 | NA                                                                   | -2.57                                 | -3.97                                      | AAEL017536 | holotricin glycine-rich repeat protein (GRRP)             | 1.75                                  | 2.06                                       |
| AAEL000547 | pickpocket                                                           | -1.82                                 |                                            | AAEL004976 | NA                                                        | 1.78                                  |                                            |
| AAEL013320 | translocon-associated protein delta subunit                          | -1.77                                 |                                            | AAEL023353 | NA                                                        | 1.81                                  | 2.23                                       |
| AAEL024471 | NA                                                                   | -1.66                                 |                                            | AAEL005748 | elastase, putative                                        | 1.82                                  | 2.07                                       |
| AAEL005032 | NA                                                                   | -1.62                                 |                                            | AAEL002557 | cationic amino acid transporter                           | 1.84                                  |                                            |
| AAEL026602 | NA                                                                   | -1.39                                 | -1.72                                      | AAEL009948 | aldehyde dehydrogenase (ALDH9948)                         | 1.87                                  |                                            |
| AAEL025498 | NA                                                                   | -1.33                                 |                                            | AAEL010094 | cyclin b                                                  | 1.91                                  |                                            |
| AAEL005528 | NA                                                                   | -1.14                                 |                                            | AAEL026440 | NA                                                        | 1.95                                  |                                            |
| AAEL001766 | leucine-rich transmembrane proteins                                  | -1.04                                 |                                            | AAEL018212 | Ubiquitinyl hydrolase 1                                   | 2.00                                  |                                            |
| AAEL002080 | septin interacting protein, putative                                 | 1.00                                  |                                            | AAEL004809 | NA                                                        | 2.00                                  | 2.86                                       |
| AAEL002124 | Clip-Domain Serine Protease family D (CLIPD6)                        | 1.00                                  | 1.11                                       | AAEL024914 | Putative synaptic vesicle transporter svop                | 2.00                                  |                                            |
| AAEL003883 | NA                                                                   | 1.02                                  |                                            | AAEL017144 | NA                                                        | 2.01                                  | 2.52                                       |
| AAEL005127 | ribonuclease UK114, putative                                         | 1.02                                  |                                            | AAEL008753 | NA                                                        | 2.02                                  | 2.70                                       |
| AAEL020823 | NA                                                                   | 1.02                                  |                                            | AAEL020097 | NA                                                        | 2.03                                  | 2.89                                       |
| AAEL002686 | testisin precursor, putative                                         | 1.04                                  | 1.23                                       | AAEL002624 | serine protease                                           | 2.04                                  | 2.38                                       |
| AAEL013844 | diazepam binding inhibitor, putative                                 | 1.06                                  |                                            | AAEL023625 | NA                                                        | 2.08                                  |                                            |
| AAEL024669 | NA                                                                   | 1.07                                  | 1.71                                       | AAEL003832 | defensin anti-microbial peptide (DEFC)                    | 2.10                                  | 3.53                                       |
| AAEL004120 | Niemann-Pick Type C-2, putative                                      | 1.08                                  | 1.39                                       | AAEL015052 | NA                                                        | 2.13                                  |                                            |
| AAEL004247 | Sialin, Sodium/sialic acid cotransporter, putative                   | 1.09                                  |                                            | AAEL008580 | NA                                                        | 2.13                                  |                                            |
| AAEL012993 | NA                                                                   | 1.11                                  |                                            | AAEL008510 | sphingosine kinase a, b                                   | 2.14                                  |                                            |
| AAEL008303 | calponin/transgelin                                                  | 1.12                                  | 1.17                                       | AAEL008473 | cysteine-rich venom protein, putative                     | 2.14                                  | 2.82                                       |
| AAEL010029 | NA                                                                   | 1.13                                  |                                            | AAEL004172 | tubulin alpha chain                                       | 2.17                                  |                                            |
| AAEL015493 | NA                                                                   | 1.13                                  | 1.23                                       | AAEL000604 | NA                                                        | 2.19                                  |                                            |
| AAEL008936 | NA                                                                   | 1.14                                  | 1.76                                       | AAEL009773 | geminin, putative                                         | 2.20                                  |                                            |
| AAEL009291 | retinoid-inducible serine carboxypeptidase (serine carboxypeptidase) | 1.14                                  | 1.44                                       | AAEL010773 | Clip-Domain Serine Protease family E. Protease homologue. | 2.22                                  | 2.75                                       |
| AAEL012725 | NA                                                                   | 1.15                                  |                                            | AAEL018241 | NA                                                        | 2.24                                  | 2.93                                       |
| AAEL024161 | NA                                                                   | 1.17                                  |                                            | AAEL000776 | NA                                                        | 2.24                                  |                                            |
| AAEL017345 | NA                                                                   | 1.17                                  | 1.66                                       | AAEL003404 | NA                                                        | 2.25                                  |                                            |
| AAEL001887 | glutamine synthetase 1, 2 (glutamate-amonia ligase) (gs)             | 1.18                                  | 1.04                                       | AAEL008137 | NA                                                        | 2.34                                  |                                            |
| AAEL000037 | Clip-Domain Serine Protease family B. (CLIPB35)                      | 1.18                                  | 1.63                                       | AAEL007237 | NA                                                        | 2.34                                  |                                            |

| GeneID     | VectorBase Description                                 | Saline-injected vs non-injected logFC | MAG extract-injected vs non-injected logFC | GeneID     | VectorBase Description                     | Saline-injected vs non-injected logFC | MAG extract-injected vs non-injected logFC |
|------------|--------------------------------------------------------|---------------------------------------|--------------------------------------------|------------|--------------------------------------------|---------------------------------------|--------------------------------------------|
| AAEL009959 | pre-mRNA splicing factor prp8                          | 1.19                                  |                                            | AAEL006208 | NA                                         | 2.35                                  |                                            |
| AAEL017098 | NA                                                     | 1.21                                  |                                            | AAEL002184 | F-actin capping protein beta subunit       | 2.36                                  |                                            |
| AAEL007102 | trypsin, putative                                      | 1.21                                  |                                            | AAEL004462 | NA                                         | 2.45                                  |                                            |
| AAEL003483 | NA                                                     | 1.22                                  | 1.95                                       | AAEL023532 | NA                                         | 2.51                                  |                                            |
| AAEL006576 | clip-domain serine protease, putative                  | 1.22                                  | 1.25                                       | AAEL011532 | NA                                         | 2.56                                  |                                            |
| AAEL021092 | NA                                                     | 1.23                                  |                                            | AAEL026038 | NA                                         | 2.63                                  |                                            |
| AAEL009476 | NA                                                     | 1.31                                  | 1.27                                       | AAEL006726 | Innexin (inx4)                             | 2.64                                  |                                            |
| AAEL028105 | NA                                                     | 1.32                                  |                                            | AAEL021169 | NA                                         | 2.81                                  |                                            |
| AAEL003469 | NHP2 protein, putative                                 | 1.32                                  |                                            | AAEL024562 | NA                                         | 2.98                                  |                                            |
| AAEL019870 | NA                                                     | 1.33                                  | 1.39                                       | AAEL002586 | NA                                         | 3.00                                  |                                            |
| AAEL004176 | microtubule binding protein, putative                  | 1.33                                  |                                            | AAEL006971 | NA                                         | 3.02                                  | 5.12                                       |
| AAEL010970 | NA                                                     | 1.35                                  |                                            | AAEL005049 | heterogeneous nuclear ribonucleoprotein    | 3.03                                  |                                            |
| AAEL002585 | serine protease                                        | 1.38                                  | 2.10                                       | AAEL003857 | defensin anti-microbial peptide (DEFD)     | 3.03                                  | 4.03                                       |
| AAEL000636 | NA                                                     | 1.38                                  |                                            | AAEL001666 | NA                                         | 3.07                                  |                                            |
| AAEL011408 | C-Type Lectin (CTL21)                                  | 1.40                                  | 1.44                                       | AAEL000961 | NA                                         | 3.08                                  |                                            |
| AAEL021077 | NA                                                     | 1.40                                  |                                            | AAEL007783 | centromere protein-A, putative             | 3.09                                  |                                            |
| AAEL015533 | NA                                                     | 1.40                                  | 1.56                                       | AAEL026714 | NA                                         | 3.11                                  |                                            |
| AAEL000786 | NA                                                     | 1.41                                  | 1.63                                       | AAEL026111 | NA                                         | 3.12                                  |                                            |
| AAEL024387 | Putative serine protease                               | 1.43                                  |                                            | AAEL020191 | NA                                         | 3.20                                  |                                            |
| AAEL002822 | actin-related protein 5 (Arp5)                         | 1.46                                  |                                            | AAEL013813 | NA                                         | 3.21                                  |                                            |
| AAEL015432 | trypsin, putative                                      | 1.49                                  |                                            | AAEL007657 | low-density lipoprotein receptor (ldl)     | 3.31                                  |                                            |
| AAEL013142 | NA                                                     | 1.49                                  |                                            | AAEL006492 | centrin, putative                          | 3.37                                  |                                            |
| AAEL002235 | NA                                                     | 1.53                                  |                                            | AAEL007097 | 4-nitrophenylphosphatase                   | 3.37                                  |                                            |
| AAEL000064 | dopachrome-conversion enzyme (DCE) isoenzyme, putative | 1.57                                  | 1.75                                       | AAEL013338 | lethal(2)essential for life protein, l2efl | 3.47                                  |                                            |
| AAEL003299 | NA                                                     | 1.58                                  | 1.72                                       | AAEL013300 | NA                                         | 3.64                                  |                                            |
| AAEL026519 | NA                                                     | 1.61                                  | 1.88                                       | AAEL008829 | NA                                         | 3.69                                  |                                            |
| AAEL003657 | zinc finger protein                                    | 1.61                                  |                                            | AAEL010097 | NA                                         | 3.91                                  |                                            |
| AAEL004978 | DEAD box ATP-dependent RNA helicase                    | 1.62                                  |                                            | AAEL000335 | lamin                                      | 4.05                                  |                                            |
| AAEL021666 | NA                                                     | 1.65                                  | 1.49                                       | AAEL004316 | NA                                         | 4.11                                  |                                            |
| AAEL002652 | NA                                                     | 1.65                                  |                                            | AAEL004388 | heme peroxidase (HPX8A)                    | 4.41                                  |                                            |
| AAEL011424 | Histone H3                                             | 1.71                                  |                                            | AAEL019534 | NA                                         | 4.51                                  |                                            |
| AAEL000800 | microsomal dipeptidase                                 | 1.72                                  |                                            | AAEL007370 | NA                                         | 5.66                                  | 5.67                                       |
| AAEL017132 | C-Type Lysozyme (Lys-C).                               | 1.73                                  | 1.78                                       | AAEL027148 | NA                                         | 6.31                                  |                                            |
| AAEL007371 | NA                                                     | 1.73                                  | 2.56                                       | AAEL004386 | chorion peroxidase (pxt)                   | 6.69                                  |                                            |
| AAEL003903 | acid phosphatase-1                                     | 1.73                                  |                                            | AAEL008098 | PIWI (PIWI2)                               | 7.88                                  |                                            |

**Supplementary Table 2.** DEGs and their respective fold change (logFC) at 24 h post MAG extract injection compared to non-injected females. DEGs that are also altered due to saline injection compared to non-injected females are not included here, and rather are listed in table S1. The logFC of DEGs that are significantly different between MAG extract-injected and saline-injected females are listed. The logFC values for those genes that are also observed to have significant transcript-level changes in the LRT [1] and spermathecae (SP) [2] from mated females compared to virgins from previous studies are included. For GeneIDs that are undefined in VectorBase and select additional GeneIDs, information from NCBI Conserved Domain Search and BLAST (tBLASTn) is noted. NA=not annotated.

| GeneID                   | VectorBase Description                                                             | Predicted Domain (PD) / BLAST (B)                        | LRT –<br>MAG extract-<br>injected vs non-<br>injected | LRT –<br>MAG extract-<br>injected vs<br>saline-injected | LRT –<br>Mated vs<br>Virgin | SP –<br>Mated vs<br>Virgin |
|--------------------------|------------------------------------------------------------------------------------|----------------------------------------------------------|-------------------------------------------------------|---------------------------------------------------------|-----------------------------|----------------------------|
| <b>IMMUNE FUNCTION</b>   |                                                                                    |                                                          |                                                       |                                                         |                             |                            |
| AAEL000200               | NA                                                                                 | VWD domain (PD)                                          | 1.00                                                  |                                                         | 1.30                        |                            |
| AAEL019650               | NA                                                                                 | Nimrod (B)                                               | 1.01                                                  | 1.14                                                    |                             |                            |
| AAEL019728<br>(SOCS)     | Suppressor of Cytokine Signaling                                                   |                                                          | 1.01                                                  |                                                         | 2.80                        | 3.52                       |
| AAEL001414<br>(LRIM9)    | leucine-rich immune protein (Short)                                                |                                                          | 1.14                                                  |                                                         |                             |                            |
| AAEL000543<br>(CTLMA11)  | C-Type Lectin (CTLMA11) - mannose binding.                                         |                                                          | 1.15                                                  |                                                         |                             |                            |
| AAEL001794               | macroglobulin/complement                                                           |                                                          | 1.41                                                  |                                                         | 1.00                        |                            |
| AAEL009474<br>(PGRPS1)   | Peptidoglycan Recognition Protein (Short)                                          |                                                          | 1.53                                                  |                                                         |                             |                            |
| AAEL019745               | NA                                                                                 | Peptidoglycan recognition protein (PGRP) (PD)            | 1.80                                                  |                                                         |                             |                            |
| AAEL017023               | NA                                                                                 | Macroglobulin (PD) / CD109 (B)                           | 1.80                                                  |                                                         |                             |                            |
| AAEL014382<br>(CTLMA14)  | C-Type Lectin (CTL) - mannose binding.                                             |                                                          | 1.82                                                  |                                                         |                             |                            |
| AAEL020192               | NA                                                                                 | Fibrinogen related domain (PD)                           | 1.86                                                  |                                                         | 2.20                        |                            |
| AAEL007626<br>(GNBPA1)   | Gram-Negative Binding Protein (GNBP) or<br>Beta-1 3-Glucan Binding Protein (BGBP). |                                                          | 2.19                                                  |                                                         | 1.90                        |                            |
| AAEL003723<br>(LYSC11)   | C-Type Lysozyme (Lys-A).                                                           |                                                          | 2.22                                                  |                                                         |                             |                            |
| AAEL012353<br>(CTL15)    | C-Type Lectin (CTL).                                                               |                                                          | 2.46                                                  |                                                         |                             |                            |
| AAEL029038               | NA                                                                                 | Cecropin (PD/B)                                          | 2.53                                                  |                                                         |                             |                            |
| AAEL006355<br>(SCRC1)    | Class C Scavenger Receptor<br>(Sushi/SCR/CCP MAM and Somatomedin<br>B domains).    |                                                          | 3.76                                                  |                                                         |                             |                            |
| AAEL029044<br>(CECE)     | Cecropin                                                                           |                                                          | 3.82                                                  | 1.90                                                    | 3.90                        |                            |
| <b>PROTEASE FUNCTION</b> |                                                                                    |                                                          |                                                       |                                                         |                             |                            |
| AAEL001178               | serine protease                                                                    | Trypsin-like serine protease (PD)                        | -1.15                                                 |                                                         | -3.30                       |                            |
| AAEL020362               | NA                                                                                 | Trypsin-like serine protease (PD)                        | 1.07                                                  |                                                         |                             |                            |
| AAEL010867               | serine protease                                                                    | Trypsin-like serine protease (PD)                        | 1.26                                                  |                                                         | 2.90                        | 1.97                       |
| AAEL002301               | serine protease                                                                    | Trypsin-like serine protease & Protease CLIP Domain (PD) | 1.35                                                  |                                                         |                             |                            |
| AAEL002580               | NA                                                                                 | Trypsin-like serine protease & Protease CLIP Domain (PD) | 1.35                                                  |                                                         |                             |                            |
| AAEL014567               | oviductin                                                                          | 2 Trypsin-like serine protease Domains (PD)              | 1.59                                                  | 1.17                                                    | 2.99                        | 2.72                       |

| GeneID                                  | VectorBase Description                                       | Predicted Domain (PD) / BLAST (B)                                                             | LRT –<br>MAG extract-<br>injected vs non-<br>injected | LRT –<br>MAG extract-<br>injected vs<br>saline-injected | LRT –<br>Mated vs<br>Virgin | SP –<br>Mated vs<br>Virgin |
|-----------------------------------------|--------------------------------------------------------------|-----------------------------------------------------------------------------------------------|-------------------------------------------------------|---------------------------------------------------------|-----------------------------|----------------------------|
| <b>PROTEASE FUNCTION (Continued)</b>    |                                                              |                                                                                               |                                                       |                                                         |                             |                            |
| AAEL005431<br>(CLIPB37)                 | Clip-Domain Serine Protease family B.                        | Trypsin-like serine protease & Regulatory CLIP Domain (PD)                                    | 1.86                                                  |                                                         |                             |                            |
| AAEL002610                              | serine protease                                              | Trypsin-like serine protease & Protease CLIP Domain (PD)                                      | 1.86                                                  |                                                         |                             |                            |
| AAEL005792<br>(CLIPB8)                  | Clip-Domain Serine Protease family E.<br>Protease homologue. | 2 Trypsin-like serine protease Domains & CLIP/disulfide knot<br>Domain (PD)                   | 2.23                                                  |                                                         |                             |                            |
| AAEL005093<br>(CLIPB46)                 | Clip-Domain Serine Protease family B.                        | Trypsin-like serine protease & Regulatory CLIP Domain (PD)                                    | 2.44                                                  |                                                         |                             |                            |
| AAEL022646                              | Larval chymotrypsin-like protein                             | Trypsin-like serine protease (PD)                                                             | 3.89                                                  |                                                         |                             | -7.30                      |
| <b>SMALL MOLECULE/HORMONE TRANSPORT</b> |                                                              |                                                                                               |                                                       |                                                         |                             |                            |
| AAEL001323                              | NA                                                           | Haemolymph juvenile hormone-binding protein (JHBP) (PB) /<br>takeout (B)                      | 1.10                                                  | 1.03                                                    | 4.90                        | 3.44                       |
| AAEL001964                              | protein serine/threonine kinase, putative                    | Insect pheromone-binding family (PB) / Ejaculatory bulb-<br>specific protein 3 (B)            | 1.63                                                  | 1.35                                                    |                             |                            |
| AAEL009927                              | NA                                                           | Haemolymph juvenile hormone-binding protein (JHBP) (PB)                                       | 1.99                                                  |                                                         |                             |                            |
| AAEL006109<br>(OBP23)                   | odorant binding protein OBP23                                |                                                                                               | 4.48                                                  |                                                         | 6.80                        | 8.57                       |
| <b>NEURONAL FUNCTION</b>                |                                                              |                                                                                               |                                                       |                                                         |                             |                            |
| AAEL014450                              | Peptidyl-glycine alpha-amidating<br>monooxygenase            | NHL/PAL-like domain (PD)                                                                      | -1.11                                                 |                                                         | -2.20                       | -1.80                      |
| AAEL019604                              | NA                                                           | MDR3 Domain (PD) / Synaptic vesicle membrane protein VAT-<br>1 homolog-like (B)               | 1.06                                                  |                                                         | 1.30                        | 2.74                       |
| AAEL003413                              | F-spondin                                                    |                                                                                               | 1.12                                                  |                                                         |                             |                            |
| AAEL023634                              | NA                                                           | Neurofilament light polypeptide-like (B)                                                      | 1.55                                                  |                                                         |                             |                            |
| AAEL005945<br>(GPRDOP4)                 | GPCR Dopamine Family                                         |                                                                                               | 1.60                                                  | 1.24                                                    |                             |                            |
| <b>TRANSCRIPTION CONTROL</b>            |                                                              |                                                                                               |                                                       |                                                         |                             |                            |
| AAEL004097                              | enhancer of split protein, putative                          | Orange & basic helix-loop-helix-orange (bHLH-O) domain (PD)                                   | -1.23                                                 |                                                         | -2.00                       |                            |
| AAEL003861                              | bmp-induced factor                                           | BTB (Broad-Complex, Tramtrack and Bric a brac) /POZ<br>(poxvirus and zinc finger) domain (PD) | -1.00                                                 |                                                         | -1.40                       |                            |
| AAEL013321                              | NA                                                           | Zn Finger (PD)                                                                                | 1.77                                                  | 1.64                                                    |                             |                            |
| <b>TRANSPORT AND METABOLISM</b>         |                                                              |                                                                                               |                                                       |                                                         |                             |                            |
| AAEL008342                              | monocarboxylate transporter                                  |                                                                                               | -1.48                                                 |                                                         | -1.10                       |                            |
| AAEL009232                              | long-chain-fatty-acid coA ligase                             |                                                                                               | -1.29                                                 |                                                         |                             |                            |
| AAEL009685                              | oxidoreductase                                               |                                                                                               | -1.07                                                 |                                                         | -4.80                       | -10.94                     |
| AAEL001194<br>(FAS1)                    | fatty acid synthase                                          |                                                                                               | -1.02                                                 |                                                         |                             |                            |
| AAEL014248                              | NA                                                           | Riboflavin transporter (B)                                                                    | 1.05                                                  |                                                         |                             |                            |
| AAEL015304                              | NA                                                           | Ester hydrolase C11orf54 homolog (B)                                                          | 1.10                                                  |                                                         |                             |                            |
| AAEL015458<br>(Tf1)                     | transferrin                                                  |                                                                                               | 1.14                                                  |                                                         | 2.70                        |                            |
| AAEL009129<br>(CYP6Z9)                  | cytochrome P450                                              |                                                                                               | 1.14                                                  |                                                         |                             |                            |
| AAEL014719                              | inosine-uridine preferring nucleoside hydrolase              |                                                                                               | 1.35                                                  |                                                         | 1.10                        |                            |

| GeneID                                      | VectorBase Description                  | Predicted Domain (PD) / BLAST (B)                                                                                                         | LRT –<br>MAG extract-<br>injected vs non-<br>injected | LRT –<br>MAG extract-<br>injected vs<br>saline-injected | LRT –<br>Mated vs<br>Virgin | SP –<br>Mated vs<br>Virgin |
|---------------------------------------------|-----------------------------------------|-------------------------------------------------------------------------------------------------------------------------------------------|-------------------------------------------------------|---------------------------------------------------------|-----------------------------|----------------------------|
| <b>TRANSPORT AND METABOLISM (Continued)</b> |                                         |                                                                                                                                           |                                                       |                                                         |                             |                            |
| AAEL012382                                  | NA                                      | C-terminal nucleotidase & MPP (CD73 ecto-5'-nucleotidase and related proteins, N-terminal metallophosphatase) domain (PD) / 5UNC-like (B) | 1.38                                                  |                                                         | 3.50                        | 4.69                       |
| AAEL006002                                  | NA                                      | Major facilitator superfamily domain-containing protein 1 (PD)                                                                            | 1.48                                                  |                                                         |                             |                            |
| AAEL000271                                  | gamma-glutamyl hydrolase                |                                                                                                                                           | 1.54                                                  |                                                         |                             |                            |
| AAEL017455                                  | NA                                      | ribonuclease E Domain (PD)                                                                                                                | 1.55                                                  |                                                         |                             |                            |
| AAEL014258                                  | monocarboxylate transporter             |                                                                                                                                           | 2.22                                                  |                                                         |                             |                            |
| AAEL004025                                  | glucose dehydrogenase                   |                                                                                                                                           | 2.39                                                  |                                                         |                             |                            |
| <b>ADDITIONAL GENES</b>                     |                                         |                                                                                                                                           |                                                       |                                                         |                             |                            |
| AAEL025361                                  | NA - Non-Coding RNA                     |                                                                                                                                           | -2.52                                                 |                                                         |                             |                            |
| AAEL022704                                  | NA                                      |                                                                                                                                           | -1.96                                                 |                                                         |                             |                            |
| AAEL004570                                  | NA                                      | Zn-finger associated domain (PD)                                                                                                          | -1.68                                                 |                                                         |                             |                            |
| AAEL028121                                  | NA - Non-Coding RNA                     |                                                                                                                                           | -1.64                                                 |                                                         |                             |                            |
| AAEL023640                                  | NA - Non-Coding RNA                     |                                                                                                                                           | -1.51                                                 |                                                         | -5.40                       |                            |
| AAEL024292                                  | NA - Non-Coding RNA                     |                                                                                                                                           | -1.51                                                 |                                                         | -1.30                       |                            |
| AAEL000240                                  | NA                                      | ubiquinone biosynthesis protein COQ9 (B)                                                                                                  | -1.24                                                 |                                                         |                             |                            |
| AAEL025444                                  | NA - Non-Coding RNA                     |                                                                                                                                           | -1.19                                                 |                                                         |                             |                            |
| AAEL025362                                  | 60S ribosomal protein L10               |                                                                                                                                           | -1.10                                                 |                                                         |                             |                            |
| AAEL022727                                  | NA - Non-Coding RNA                     |                                                                                                                                           | -1.07                                                 |                                                         | -3.60                       |                            |
| AAEL011478                                  | cytoplasmic dynein light chain          |                                                                                                                                           | -1.06                                                 |                                                         |                             |                            |
| AAEL014843                                  | heat shock protein                      |                                                                                                                                           | 1.01                                                  |                                                         |                             |                            |
| AAEL024482                                  | NA                                      |                                                                                                                                           | 1.03                                                  |                                                         |                             |                            |
| AAEL001901                                  | MRAS2, putative                         | P-loop containing Nucleoside Triphosphate Hydrolases (PD) / ras-related and estrogen-regulated growth inhibitor-like protein (B)          | 1.07                                                  |                                                         |                             |                            |
| AAEL001851                                  | NA                                      | Chromosome segregation ATPase & gp58-like protein (PD)                                                                                    | 1.10                                                  |                                                         |                             |                            |
| AAEL017113                                  | H/ACA ribonucleoprotein complex subunit |                                                                                                                                           | 1.11                                                  |                                                         |                             |                            |
| AAEL023691                                  | NA - Non-Coding RNA                     |                                                                                                                                           | 1.16                                                  |                                                         |                             |                            |
| AAEL026403                                  | NA - Non-Coding RNA                     |                                                                                                                                           | 1.19                                                  |                                                         |                             |                            |
| AAEL026833                                  | NA                                      |                                                                                                                                           | 1.20                                                  |                                                         |                             |                            |
| AAEL007778                                  | leucine-rich transmembrane protein      |                                                                                                                                           | 1.41                                                  |                                                         |                             |                            |
| AAEL013262                                  | NA                                      | Glycoside hydrolase family 19, chitinase domain (PD) / endochitinase (B)                                                                  | 1.51                                                  |                                                         |                             |                            |
| AAEL022454                                  | NA - Non-Coding RNA                     |                                                                                                                                           | 1.53                                                  |                                                         |                             |                            |
| AAEL021795                                  | NA                                      |                                                                                                                                           | 1.55                                                  |                                                         |                             | -1.66                      |
| AAEL012853                                  | NA                                      |                                                                                                                                           | 2.00                                                  | 1.00                                                    |                             |                            |
| AAEL012856                                  | NA                                      |                                                                                                                                           | 2.06                                                  |                                                         | 2.20                        |                            |
| AAEL029107                                  | NA                                      |                                                                                                                                           | 2.40                                                  |                                                         |                             |                            |
| AAEL026265                                  | NA - Non-Coding RNA                     |                                                                                                                                           | 2.44                                                  |                                                         | 2.60                        |                            |
| AAEL025126                                  | NA                                      |                                                                                                                                           | 2.47                                                  |                                                         |                             |                            |
| AAEL017380                                  | NA                                      |                                                                                                                                           | 3.18                                                  | 2.19                                                    |                             |                            |
| AAEL001392                                  | NA                                      |                                                                                                                                           | 3.52                                                  | 2.00                                                    |                             |                            |
| AAEL013515                                  | pupal cuticle protein, putative         |                                                                                                                                           | 4.18                                                  | 3.58                                                    |                             |                            |
| AAEL008050                                  | NA                                      | Ribosome inactivating protein (RIP) (PD)                                                                                                  | 4.23                                                  |                                                         |                             |                            |

**Supplementary Table 3.** Genes with differential gene expression between both MAG extract-injected and saline-injected compared to non-injected females, which also are differentially expressed in either the LRT [1] or Spermathecae (SP) [2] in mated females after 24 h. The degree of transcript change (logFC) is noted as is additional information from NCBI tools Conserved Domain Search and BLAST (tBLASTn) for select gene IDs. NA=not annotated.

| <b>GeneID</b>           | <b>VectorBase</b>                          | <b>Predicted Domain (PD) / BLAST (B)</b>                    | <b>LRT –<br/>Saline-<br/>injected vs<br/>non-injected</b> | <b>LRT –<br/>MAG extract-<br/>injected vs<br/>non-injected</b> | <b>LRT –<br/>Mated vs.<br/>Virgin</b> | <b>SP –<br/>Mated vs.<br/>Virgin</b> |
|-------------------------|--------------------------------------------|-------------------------------------------------------------|-----------------------------------------------------------|----------------------------------------------------------------|---------------------------------------|--------------------------------------|
| AAEL026602              | NA                                         | L-ascorbate oxidase (PD) / Lacasse (B)                      | -1.39                                                     | -1.72                                                          | -1.31                                 |                                      |
| AAEL009291              | retinoid-inducible serine carboxypeptidase | Serine Carboxypeptidase (PD)                                | 1.14                                                      | 1.44                                                           | 1.21                                  | 2.20                                 |
| AAEL015533              | NA                                         | 2 Trypsin-like serine protease domains (PD)                 | 1.40                                                      | 1.56                                                           | 1.07                                  |                                      |
| AAEL000037<br>(CLIPB35) | Clip-Domain Serine Protease family B.      | Trypsin-like serine protease & Protease CLIP Domain<br>(PD) | 1.18                                                      | 1.63                                                           | 1.64                                  | 1.66                                 |
| AAEL003832<br>(DEFC)    | defensin anti-microbial peptide            |                                                             | 2.10                                                      | 3.53                                                           | 2.81                                  | 4.10                                 |
| AAEL003857<br>(DEFD)    | defensin anti-microbial peptide            |                                                             | 3.03                                                      | 4.03                                                           | 3.56                                  | 3.37                                 |

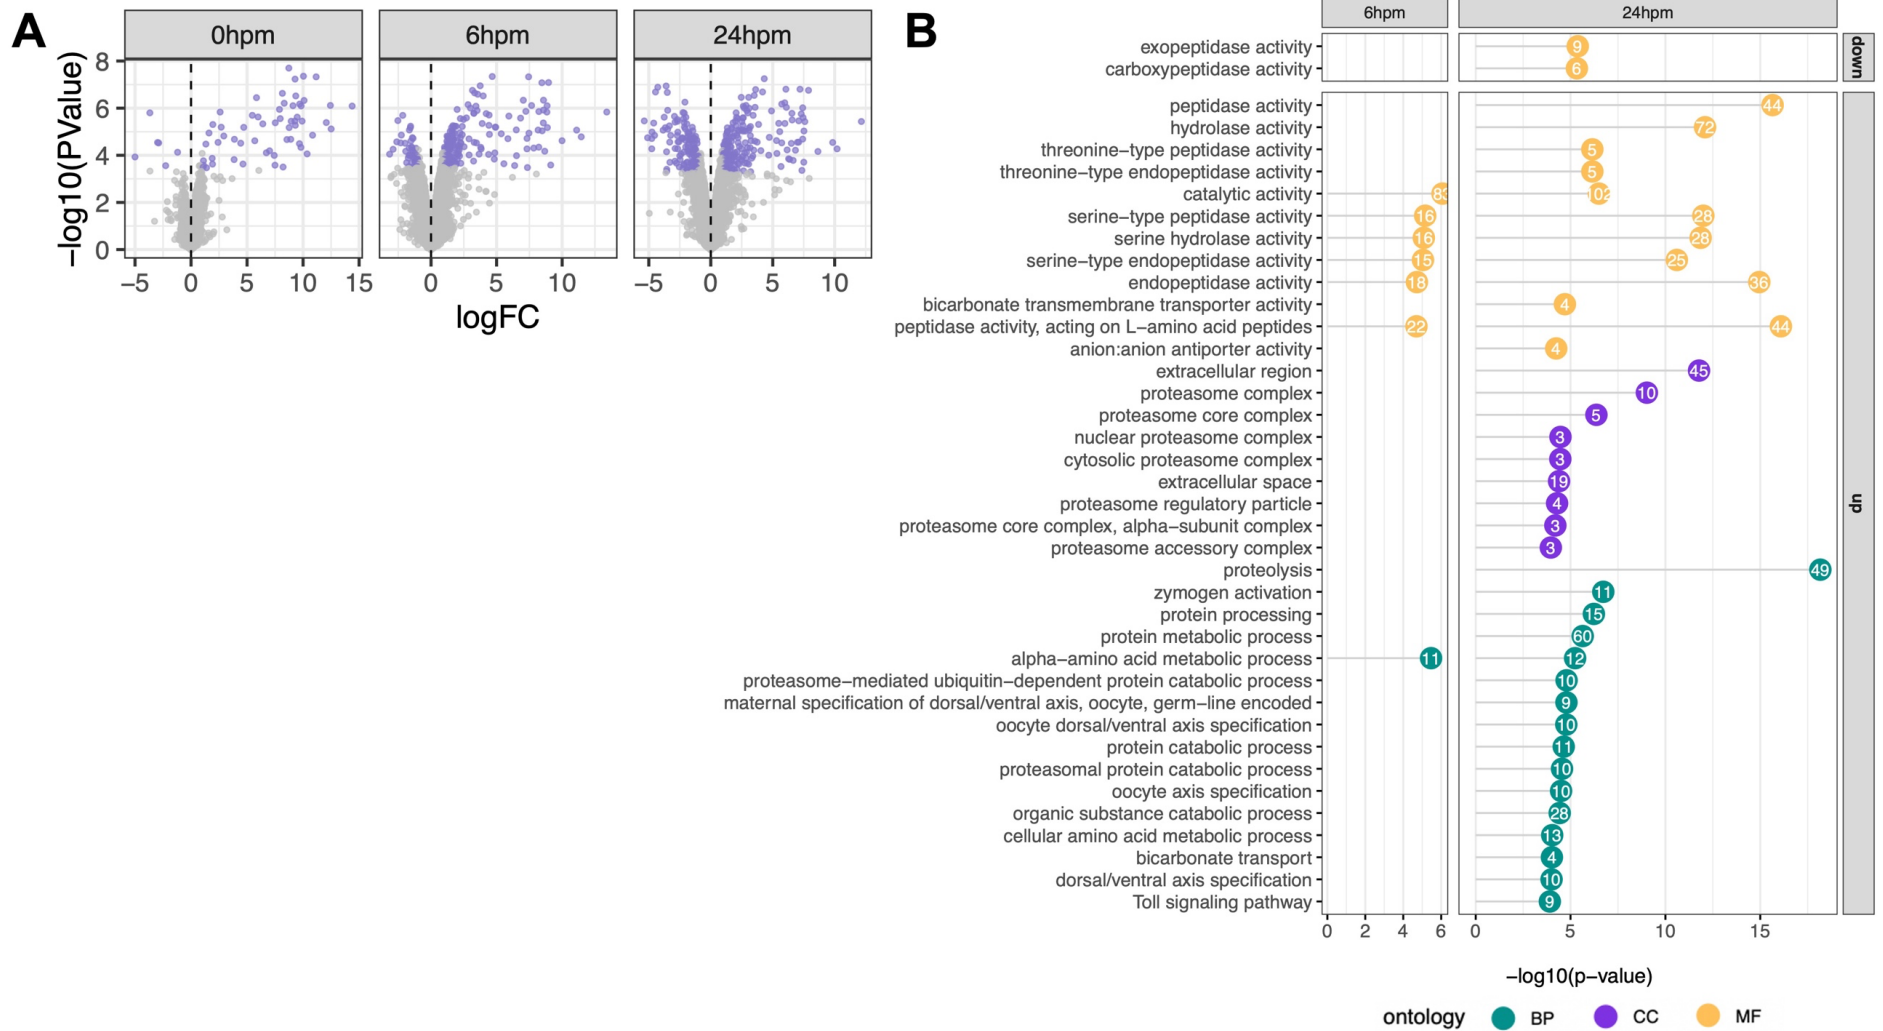

**Supplementary Figure 1.** Re-analysis of transcript-level changes in LRT of mated females [1]. (A) Volcano plots depicting all DEGs in the LRT between virgin and mated females at 0, 6, and 24 h post-mating (hpm). Significant transcript level changes highlighted in purple. (B) Enriched Gene Ontology (GO) Terms at 6 and 24 hpm. Circle denotes number of genes included in a particular GO term. BP=Biological Process; CC=Cellular Component; MF=Molecular Function.



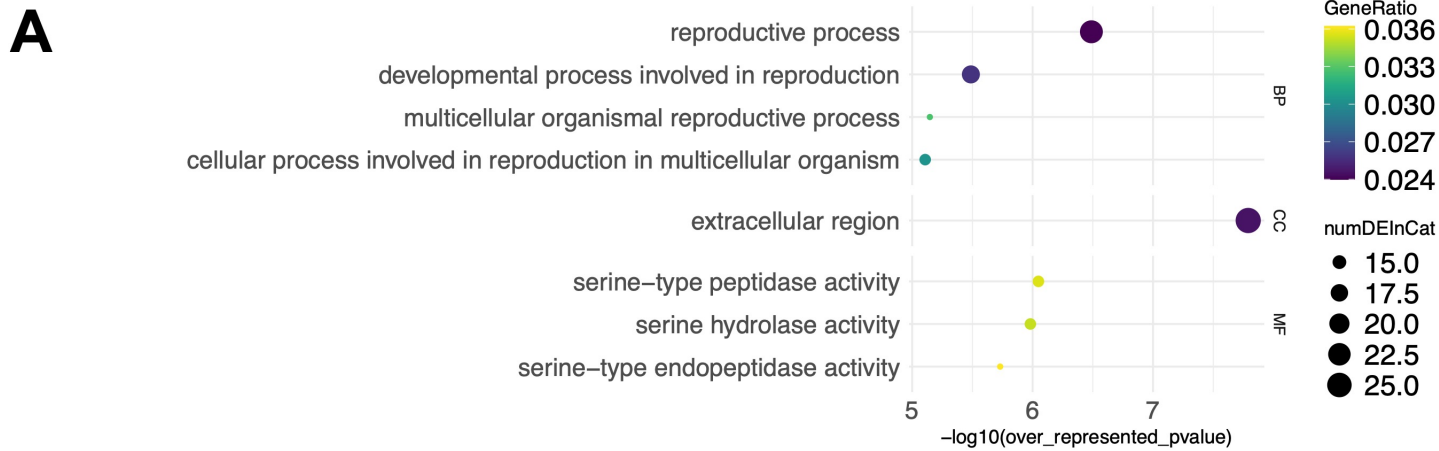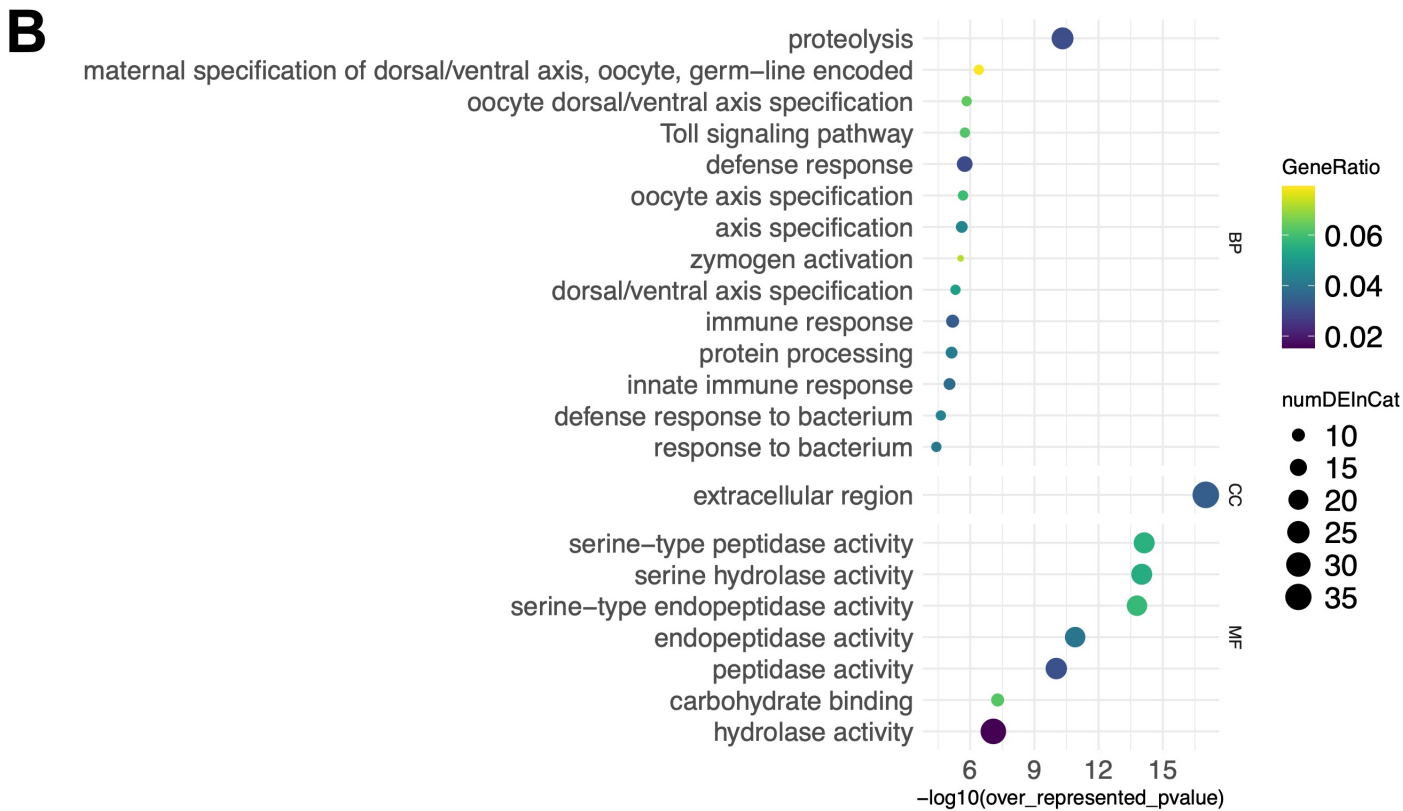

**Supplementary Figure 2.** Gene Ontology (GO) enrichment analysis. Enriched Gene Ontology (GO) Terms from DEGs at 24 h after injection with (A) saline or (B) MAG extract. BP=Biological Process; CC=Cellular Component; MF=Molecular Function.

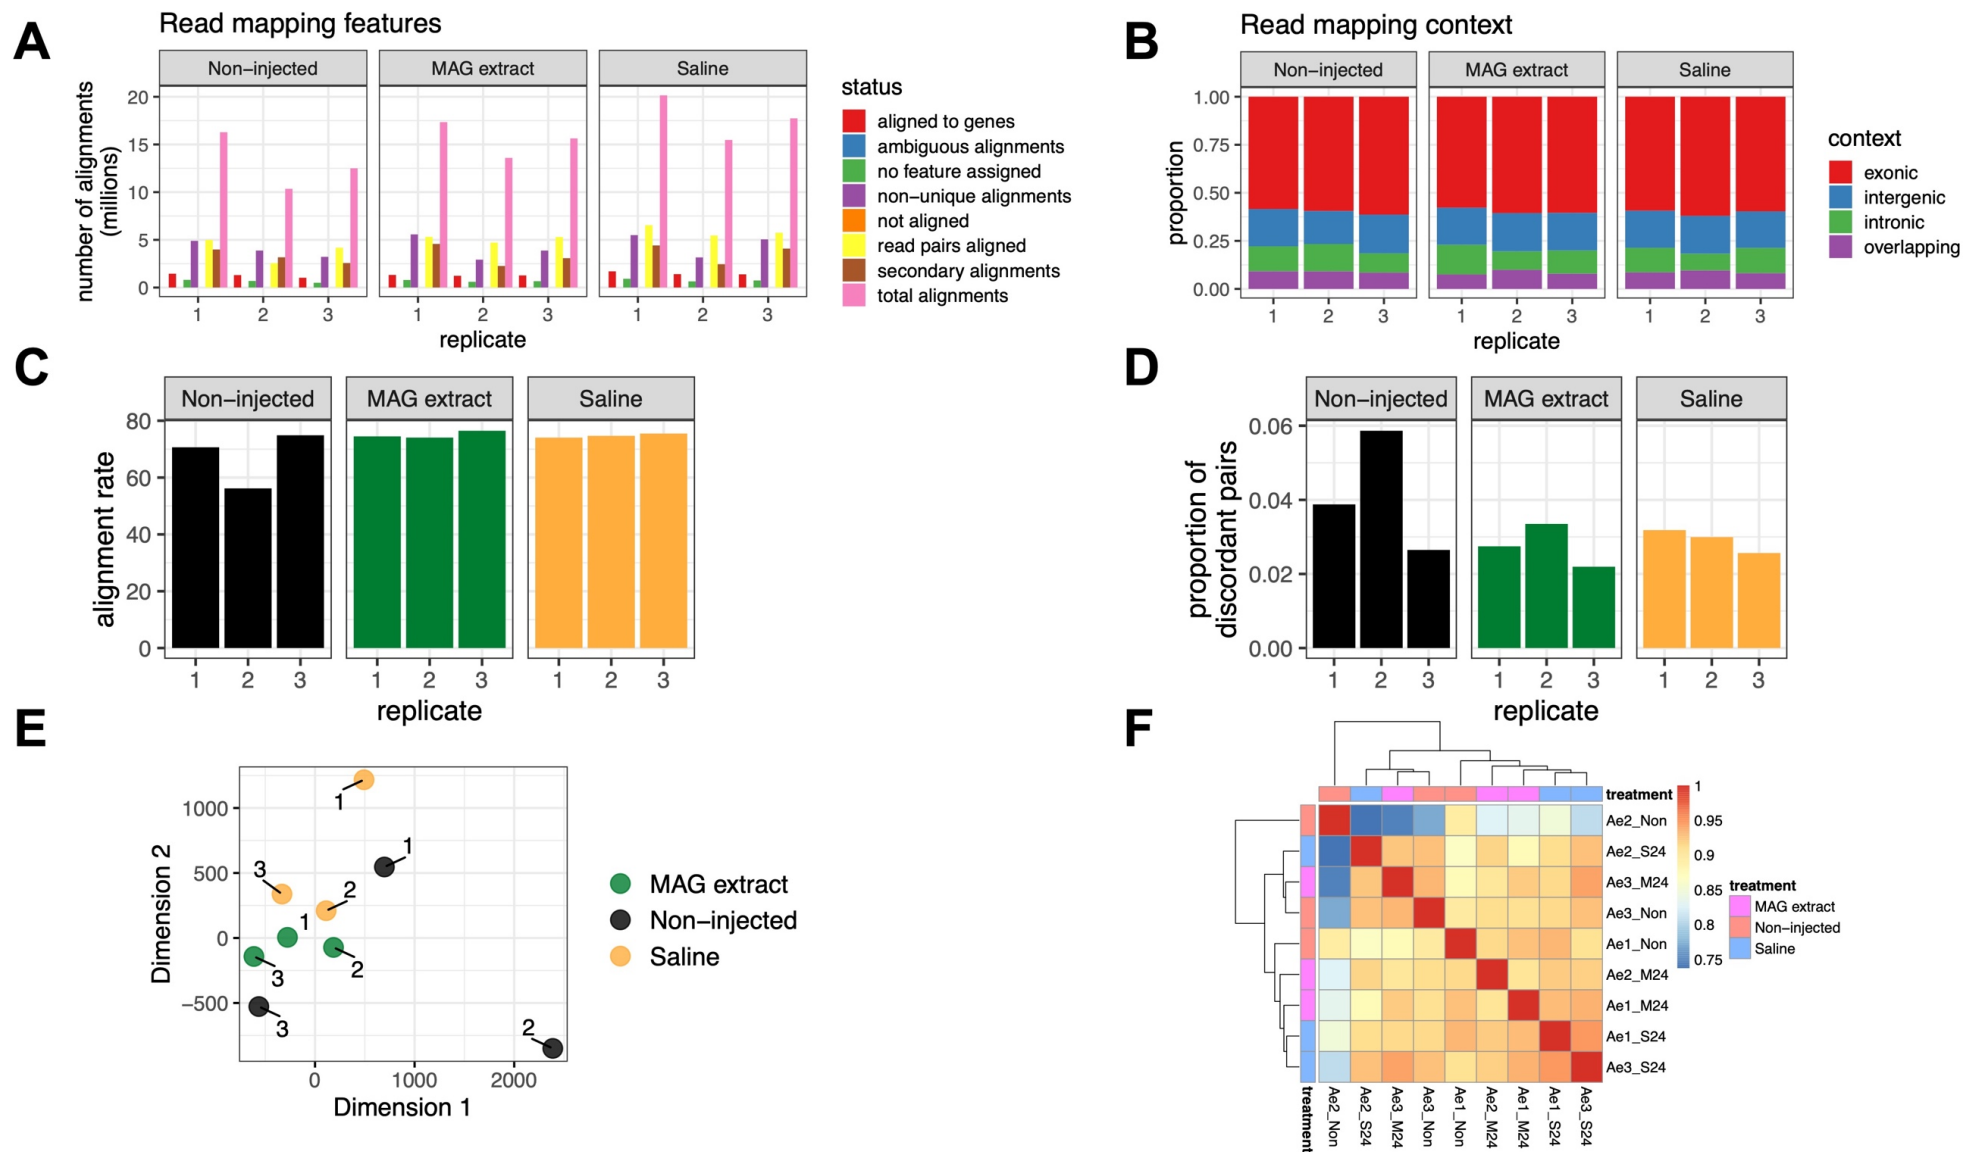

**Supplementary Figure 3.** Quality control of library sequencing reads. (A) Counts of read mapping features for all libraries from all replicates and treatments indicated by raw number. (B) Proportions of reads mapping to genomic features across all samples. (C) Alignment rate and (D) proportion of discordant pairs across all samples. Note that reads from the library for replicate 2 of non-injected females has a lower alignment rate (56.2% vs. 71-76% for other samples) and higher proportion of discordant pairs (6% vs. 2-3% for other samples). (E) Multi-dimensional scaling (MDS) plot and (F) Pearson correlation heatmap of all replicates and treatments prior to RUVSeq batch correction. Note that replicate 2 for non-injected treatment is outside the grouping of all other samples; hence this example was excluded from analyses, as noted in the text.

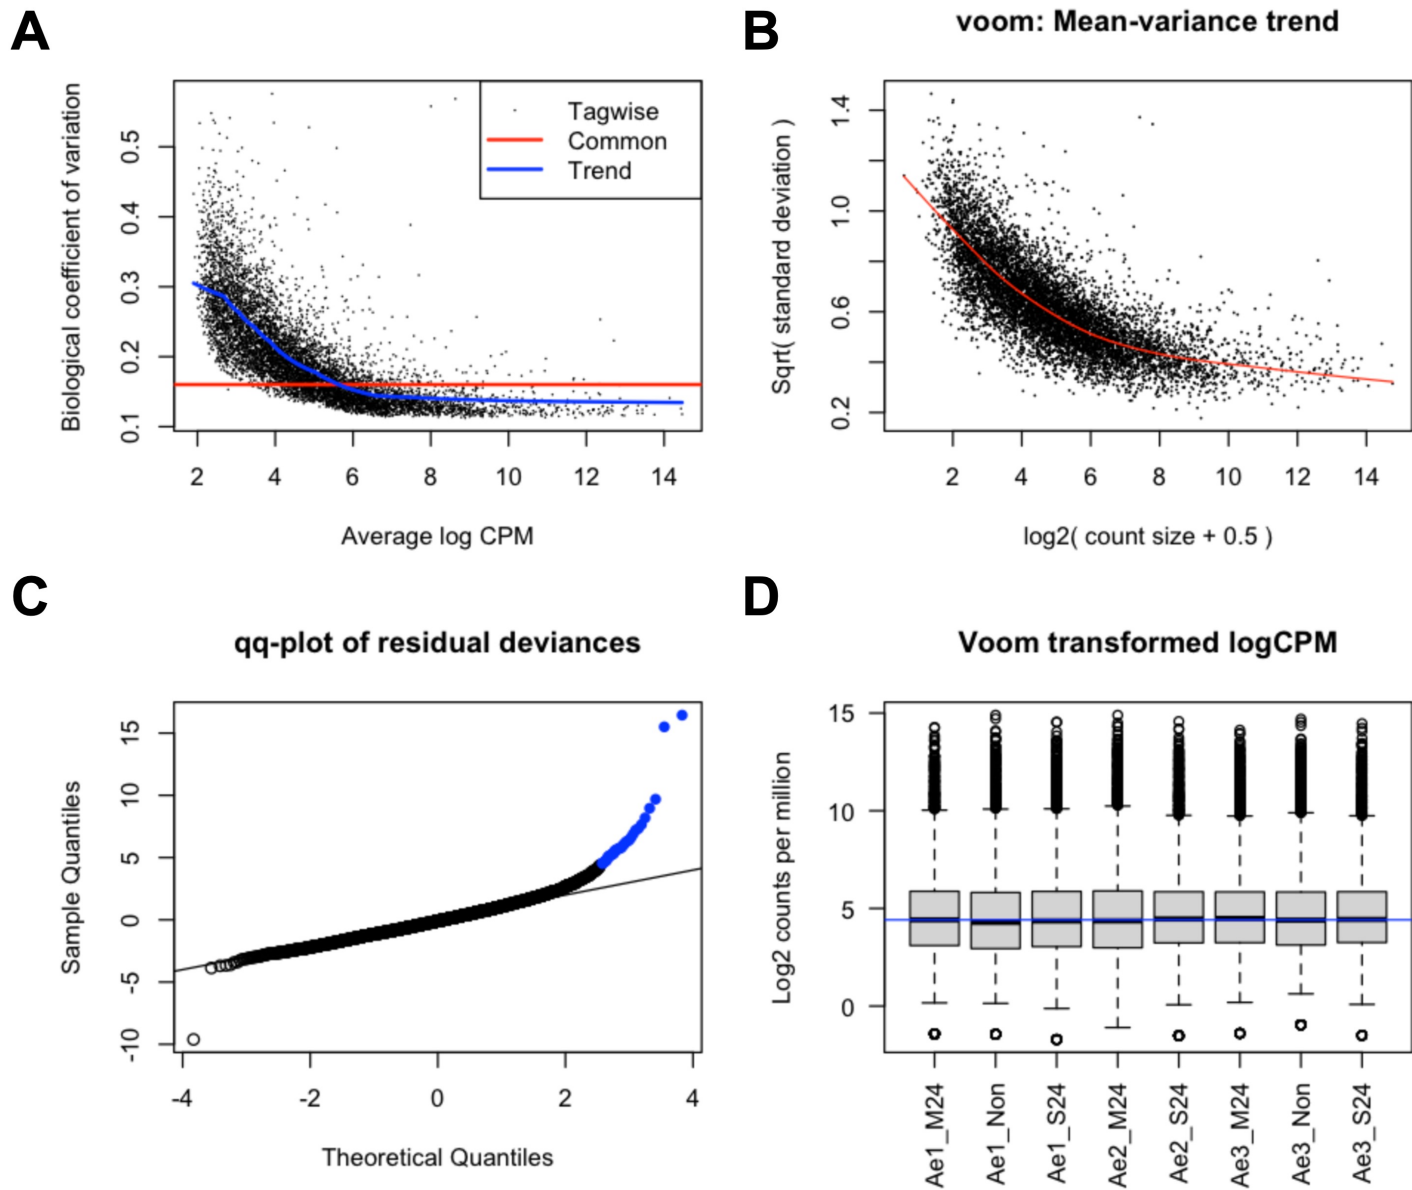

**Supplementary Figure 4.** Transcript normalization before differential expression analysis (A) Biological Coefficient Variation (BCV) mean-variance trend and model fit. (B) Voom precision weights for mean variance trends. (C) Quantile-Quantile (Q-Q plot) for the distribution of the sample transcript expression. (D) Log2 counts per million trends per sample using voom transformed log counts per million (logCPM).

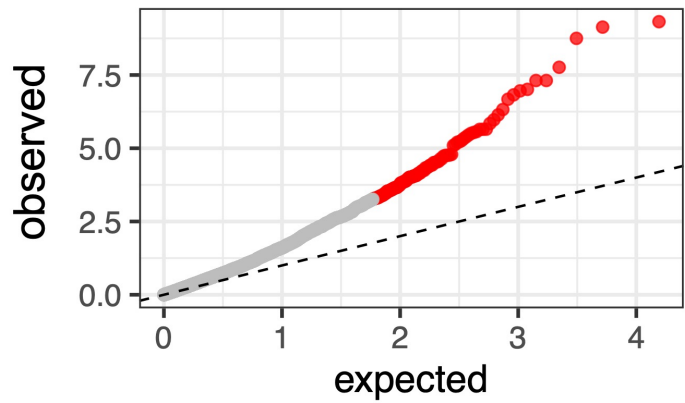

Saline-injected vs. non-injected

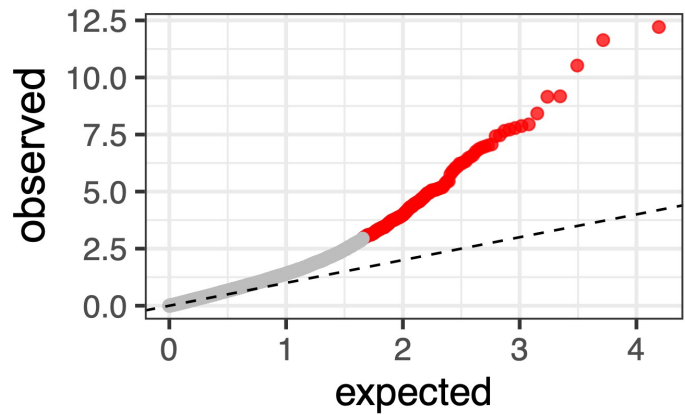

MAG extract-injected vs. non-injected

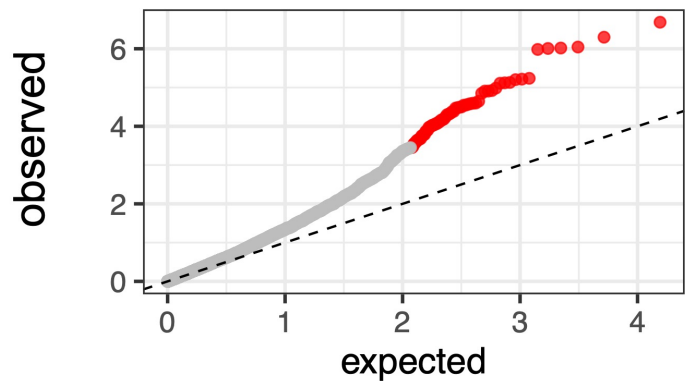

MAG extract-injected vs. Saline-injected

**Supplementary Figure 5.** Quantile-Quantile (Q-Q plot) for the distribution of all comparisons made in our analysis. The red dots show the genes that cross the 95% confidence interval to designate the differentially expressed genes. The dashed line shows the 95% normal distribution confidence intervals.

## Supplementary References

1. Alfonso-Parra C, Ahmed-Braimah YH, Degner EC, Avila FW, Villarreal SM, Pleiss JA, et al. Mating-Induced Transcriptome Changes in the Reproductive Tract of Female *Aedes aegypti*. Benedict MQ, editor. PLoS Negl Trop Dis. Public Library of Science; 2016;10:e0004451.
2. Camargo C, Ahmed-Braimah YH, Amaro IA, Harrington LC, Wolfner MF, Avila FW. Mating and blood-feeding induce transcriptome changes in the spermathecae of the yellow fever mosquito *Aedes aegypti*. Sci Rep. 2nd ed. Nature Publishing Group; 2020;10:14899–13.
